# Supplementary material for: Systematic assessment of the achieved emission reductions of carbon crediting projects
Source: PubMed Central journal article supplement (PMC11564741; doi:10.1038/s41467-024-53645-z), 2024-11-14
Supplement: 41467_2024_53645_MOESM1_ESM.pdf [file 41467_2024_53645_MOESM1_ESM.pdf]

## **Supplementary Information for Systematic assessment of the achieved emission reductions of carbon crediting projects**

Benedict S. Probst <sup>\*1,2,3</sup>, Malte Toetzke<sup>1,4</sup>, Andreas Kontoleon<sup>3</sup>, Laura Díaz Anadón<sup>3,5</sup>, Jan C. Minx<sup>6,7</sup>, Barbara K. Haya<sup>8</sup>, Lambert Schneider<sup>9</sup>, Philipp A. Trotter<sup>10,11</sup>, Thales A.P. West<sup>3,12</sup>, Annelise Gill-Wiehl<sup>13</sup>, Volker H. Hoffmann<sup>2</sup>

<sup>1</sup> Net Zero Lab, Max Planck Institute for Innovation and Competition, Munich, Germany

<sup>2</sup> Group for Sustainability and Technology, ETH Zurich, Zurich, Switzerland

<sup>3</sup> Centre for Energy, Environment and Natural Resource Governance, Department of Land Economy, University of Cambridge, Cambridge, United Kingdom

<sup>4</sup> Public Policy for the Green Transition, Technical University Munich, Germany

<sup>5</sup> Harvard Kennedy School, Harvard University, Boston, United States

<sup>6</sup> Mercator Research Institute on Global Commons and Climate Change, Berlin, Germany

<sup>7</sup> Priestley International Centre for Climate, School of Earth and Environment, Leeds, United Kingdom

<sup>8</sup> Goldman School of Public Policy, University of California, Berkeley, USA

<sup>9</sup> Öko-Institut, Berlin, Germany

<sup>10</sup> Schumpeter School of Business and Economics, University of Wuppertal, Wuppertal, Germany

<sup>11</sup> Smith School of Enterprise and the Environment, University of Oxford, Oxford, United Kingdom

<sup>12</sup> Institute for Environmental Studies (IVM), Vrije Universiteit Amsterdam, Amsterdam, Netherlands

<sup>13</sup> Energy & Resources Group, University of California, Berkeley, United States

---

\* Corresponding author, [benedict.probst@ip.mpg.de](mailto:benedict.probst@ip.mpg.de)

## Table of Contents

|                                                                                                                       |           |
|-----------------------------------------------------------------------------------------------------------------------|-----------|
| <b>Supplementary Table 1: Inclusion and exclusion criteria for studies.....</b>                                       | <b>3</b>  |
| <b>Supplementary Table 2: Keywords used for search in SCOPUS. All articles downloaded: 26. Aug. 2022. ....</b>        | <b>3</b>  |
| <b>Supplementary Table 3: Keywords used for search in Web of Science. All articles downloaded: 26. Aug. 2022.....</b> | <b>5</b>  |
| <b>Supplementary Table 4: Studies evaluating carbon crediting projects .....</b>                                      | <b>6</b>  |
| <b>Supplementary Table 5: Studies evaluating field interventions .....</b>                                            | <b>8</b>  |
| <b>Supplementary Table 6: OAR detailed approach for calculations .....</b>                                            | <b>14</b> |
| <b>Supplementary Table 7: Studies that could not be integrated into quantitative framework .....</b>                  | <b>16</b> |
| <b>Supplementary Figure 1: ROSES flow diagram for systematic reviews.....</b>                                         | <b>17</b> |

Supplementary Table 1: Inclusion and exclusion criteria for studies.

|                  | Population | Intervention                                                                                             | Comparator                                                                                                                                                                  | Outcome                                                                | Study type                                                                                                                                                                                                                      |
|------------------|------------|----------------------------------------------------------------------------------------------------------|-----------------------------------------------------------------------------------------------------------------------------------------------------------------------------|------------------------------------------------------------------------|---------------------------------------------------------------------------------------------------------------------------------------------------------------------------------------------------------------------------------|
| <b>Inclusion</b> | -          | Voluntary, project-based activities that seek to reduce or remove emissions                              | Projects, land, or households that were not subject to the intervention (this can include historical data of the same project before it became a carbon mitigation project) | CO2e-emissions reduction (or comparable metric, such as deforestation) | Quantitative estimates based on randomised controlled trial or rigorous observational studies (which includes both modelling and empirical studies). These include working paper aimed at peer-reviewed journals and PhD theses |
| <b>Exclusion</b> | -          | Non-voluntary activities (e.g., mandatory regulation) or non-project-based activities (e.g., carbon tax) | Without comparator                                                                                                                                                          | Without quantified impact of intervention                              | Qualitative studies                                                                                                                                                                                                             |

Supplementary Table 2: Keywords used for search in SCOPUS. All articles downloaded: 26. Aug. 2022.

| Search Keywords in SCOPUS     |                                                                                                                                                                                                                                                                                                                  |
|-------------------------------|------------------------------------------------------------------------------------------------------------------------------------------------------------------------------------------------------------------------------------------------------------------------------------------------------------------|
| <b>1. Population</b>          | -                                                                                                                                                                                                                                                                                                                |
| <b>2. Intervention</b>        |                                                                                                                                                                                                                                                                                                                  |
| Generic                       | "project-based mechanism*" OR "tradable emission* reduc* credit*" OR "carbon market*" OR "voluntary project*" OR "carbon W/5 offset*" OR "condition* payment*" OR "condition* cash transfer*" OR "economic* incentiv*" OR "clean development mechanism" OR "joint implementation mechanism" OR "kyoto protocol*" |
| Forestry and Land Use         |                                                                                                                                                                                                                                                                                                                  |
| REDD+                         | "reduc* emission* from deforestation and forest degradation" OR "reduc* emission* from deforestat* and degradat*" OR "deforestat* reduc*" OR "payment* for ecosystem service*" OR "payment* for environmental services" OR "cash payment" OR "condition* pay*" OR "REDD+" OR "REDD"                              |
| Improved Forest Management    | "forest*" W/5 ("manag*")                                                                                                                                                                                                                                                                                         |
| Afforestation / Reforestation | (payment* OR subsid*) W/5 (forest* OR plantat*) OR "afforest*" OR "reforest*"                                                                                                                                                                                                                                    |
| Renewable Energy              |                                                                                                                                                                                                                                                                                                                  |
| Wind                          | (wind) W/5 (farm* OR project* OR power OR energy)                                                                                                                                                                                                                                                                |
| Solar                         | (solar) W/5 (farm* OR project* OR power OR energy)                                                                                                                                                                                                                                                               |

|                                           |                                                                                                                                                                                                                                                                                                                                                                                                          |
|-------------------------------------------|----------------------------------------------------------------------------------------------------------------------------------------------------------------------------------------------------------------------------------------------------------------------------------------------------------------------------------------------------------------------------------------------------------|
| Hydro                                     | (hydro*) W/5 (project OR power OR energy)                                                                                                                                                                                                                                                                                                                                                                |
| Biomass                                   | (biomass) W/5 (project OR power OR energy)                                                                                                                                                                                                                                                                                                                                                               |
| Waste management                          |                                                                                                                                                                                                                                                                                                                                                                                                          |
| Landfill / wastewater methane             | "landfill" W/5 ("gas" OR "methane") OR "wastewater" W/5 ("gas" OR "methane")                                                                                                                                                                                                                                                                                                                             |
| Chemical processes                        |                                                                                                                                                                                                                                                                                                                                                                                                          |
| Ozone depleting substances                | "HFC-23" OR "SF6" OR "ozone" W/5 "deplet*" OR "refrig*"                                                                                                                                                                                                                                                                                                                                                  |
| N2O destruction in nitric acid production | "N2O" AND "nitric*"                                                                                                                                                                                                                                                                                                                                                                                      |
| Household and community                   |                                                                                                                                                                                                                                                                                                                                                                                                          |
| Cookstoves                                | *stove*                                                                                                                                                                                                                                                                                                                                                                                                  |
| Industrial manufacturing                  |                                                                                                                                                                                                                                                                                                                                                                                                          |
| Mine methane capture                      | "mine" AND "methane" AND "captur*"                                                                                                                                                                                                                                                                                                                                                                       |
| Natural gas electricity production        | "natural" AND "gas" W/5 (project OR power OR energy)                                                                                                                                                                                                                                                                                                                                                     |
| Carbon capture and storage                |                                                                                                                                                                                                                                                                                                                                                                                                          |
| Carbon capture and enhanced oil recovery  | "carbon" W/5 "captur*"                                                                                                                                                                                                                                                                                                                                                                                   |
| <b>3. Comparator</b>                      |                                                                                                                                                                                                                                                                                                                                                                                                          |
| Generic                                   | "control group*" OR "randomized trial" OR "evaluat*" OR "before-after-control-intervention" OR assess* OR impact* OR causal* OR "synthetic* control*" OR mechanism OR "quasi-experiment*" OR "Random* Control* Trial" OR "Random* trial*" OR "ex post" OR "ex post" OR baseline OR "difference*-in-difference*" OR "identification strategy" OR compliance OR "synthetic* match*" OR "confound* factors" |
| <b>4. Outcome</b>                         |                                                                                                                                                                                                                                                                                                                                                                                                          |
|                                           | "environment* integrity" OR (CO2 OR carbon OR SF6 OR HFC-23 OR "waste gas*" OR deforest* OR "forest*" OR "tree cover" OR "land cover" OR conservation OR "fuel" OR "greenhouse gas*" OR "wood*" OR "*coal") W/5 (abat* OR "produc*" OR generat* OR lower* OR "conserv*" OR "impact*" OR "increas*" OR loss OR protect* OR "additional" OR "change" OR "decline*" OR "consum*" OR curb OR sav*)           |

**Supplementary Table 3:** Keywords used for search in Web of Science. All articles downloaded: 26. Aug. 2022

| Search Keywords in WOS                    |                                                                                                                                                                                                                                                                                                                     |
|-------------------------------------------|---------------------------------------------------------------------------------------------------------------------------------------------------------------------------------------------------------------------------------------------------------------------------------------------------------------------|
| <b>1. Population</b>                      | -                                                                                                                                                                                                                                                                                                                   |
| <b>2. Intervention</b>                    |                                                                                                                                                                                                                                                                                                                     |
| Generic                                   | “project-based mechanism*” OR “tradable emission* reduc* credit*” OR “carbon market*” OR “voluntary project*” OR “carbon NEAR/5 offset*” OR “condition* payment*” OR “condition* cash transfer*” OR “economic* incentiv*” OR “clean development mechanism” OR “joint implementation mechanism” OR “kyoto protocol*” |
| Forestry and Land Use                     |                                                                                                                                                                                                                                                                                                                     |
| REDD+                                     | "reduc* emission* from deforestation and forest degradation" OR "reduc* emission* from deforestat* and degradat*" OR "deforestat* reduc*" OR "payment* for ecosystem service*" OR "payment* for environmental services" OR "cash payment" OR “condition* pay*” OR "REDD+" OR "REDD"                                 |
| Improved Forest Management                | "forest*" NEAR/5 ("manag*") W/5 “improv*”                                                                                                                                                                                                                                                                           |
| Afforestation / Reforestation             | (payment* OR subsid*) NEAR/5 (forest* OR plantat*) OR “afforest*” OR “reforest*”                                                                                                                                                                                                                                    |
| Renewable Energy                          |                                                                                                                                                                                                                                                                                                                     |
| Wind                                      | (wind) NEAR/5 (farm* OR project* OR power OR energy)                                                                                                                                                                                                                                                                |
| Solar                                     | (solar) NEAR/5 (farm* OR project* OR power OR energy)                                                                                                                                                                                                                                                               |
| Hydro                                     | (hydro*) NEAR/5 (project OR power OR energy)                                                                                                                                                                                                                                                                        |
| Biomass                                   | (biomass) NEAR/5 (project OR power OR energy)                                                                                                                                                                                                                                                                       |
| Waste management                          |                                                                                                                                                                                                                                                                                                                     |
| Landfill / wastewater methane             | “landfill” NEAR/5 (“gas” OR “methane”) OR “wastewater” NEAR/10 (“gas” OR “methane”)                                                                                                                                                                                                                                 |
| Chemical processes                        |                                                                                                                                                                                                                                                                                                                     |
| Ozone depleting substances                | “HFC-23” OR “SF6” OR “ozone” NEAR/5 “deplet*” OR “regfrig*”                                                                                                                                                                                                                                                         |
| N2O destruction in nitric acid production | “N2O” AND “nitric*”                                                                                                                                                                                                                                                                                                 |
| Household and community                   |                                                                                                                                                                                                                                                                                                                     |
| Cookstoves                                | *stove*                                                                                                                                                                                                                                                                                                             |
| Industrial manufacturing                  |                                                                                                                                                                                                                                                                                                                     |
| Mine methane capture                      | “mine" AND "methane" AND "captur*”                                                                                                                                                                                                                                                                                  |

|                                          |                                                                                                                                                                                                                                                                                                                                                                                                          |
|------------------------------------------|----------------------------------------------------------------------------------------------------------------------------------------------------------------------------------------------------------------------------------------------------------------------------------------------------------------------------------------------------------------------------------------------------------|
| Natural gas electricity production       | "gas" NEAR/5 (project OR power OR energy)                                                                                                                                                                                                                                                                                                                                                                |
| Carbon capture and storage               |                                                                                                                                                                                                                                                                                                                                                                                                          |
| Carbon capture and enhanced oil recovery | "carbon" NEAR/5 "captur**"                                                                                                                                                                                                                                                                                                                                                                               |
| <b>3. Comparator</b>                     |                                                                                                                                                                                                                                                                                                                                                                                                          |
| Generic                                  | "control group*" OR "randomized trial" OR "evaluat*" OR "before-after-control-intervention" OR assess* OR impact* OR causal* OR "synthetic* control*" OR mechanism OR "quasi-experiment*" OR "Random* Control* Trial" OR "Random* trial*" OR "ex post" OR "ex post" OR baseline OR "difference*-in-difference*" OR "identification strategy" OR compliance OR "synthetic* match*" OR "confound* factors" |
| <b>4. Outcome</b>                        |                                                                                                                                                                                                                                                                                                                                                                                                          |
|                                          | "environment* integrity" OR (CO2 OR carbon OR SF6 OR HFC-23 OR "waste gas*" OR deforest* OR "forest*" OR "tree cover" OR "land cover" OR conservation OR "fuel" OR "greenhouse gas*" OR "wood*" OR "coal") W/5 (abat* OR "produc*" OR generat* OR lower* OR "conserv*" OR "impact*" OR "increas*" OR loss OR protect* OR "additional" OR "change" OR "decline*" OR "consum*" OR curb OR sav*)            |

Supplementary Table 4: Studies evaluating carbon crediting projects

| # | Authors               | Title                                                                                         | DOI                     | Year | Region   | Country  | Sector           | Project type            |
|---|-----------------------|-----------------------------------------------------------------------------------------------|-------------------------|------|----------|----------|------------------|-------------------------|
| 1 | Chan and Huenteler    | Financing Wind Energy Deployment in China through the Clean Development Mechanism             | NA                      | 2015 | Asia     | China    | Renewable Energy | Wind                    |
| 2 | Calel et al.          | Do Carbon Offsets Offset Carbon?                                                              | NA                      | 2021 | Asia     | India    | Renewable Energy | Wind                    |
| 3 | Schneider             | Perverse incentives under the cdm: an evaluation of hfc-23 destruction projects               | 10.3763/cpol.2010.0096  | 2011 | Multiple | Multiple | Chemical         | HFC-23                  |
| 4 | Schneider and Kollmus | Perverse effects of carbon markets on hfc-23 and sf6 abatement projects in russia             | 10.1038/nclimate2772    | 2015 | Europe   | Russia   | Chemical         | HFC-23, SF <sub>6</sub> |
| 5 | Aung et al.           | Health and climate-relevant pollutant concentrations from a carbon-finance approved cookstove | 10.1021/acs.est.5b06208 | 2016 | Asia     | India    | Household        | Cookstoves              |

|    |                            |                                                                                                                                     |                             |      |                  |          |           |                       |  |
|----|----------------------------|-------------------------------------------------------------------------------------------------------------------------------------|-----------------------------|------|------------------|----------|-----------|-----------------------|--|
|    |                            | intervention in rural india                                                                                                         |                             |      |                  |          |           |                       |  |
| 6  | Gill-Wiehl et al.          | Cooking the books: Pervasive over-crediting from cookstoves offset methodologies                                                    | 10.21203/rs.3.rs-2606020/v1 | 2022 | Multiple         | Multiple | Household | Cook-stoves           |  |
| 7  | West et al.                | Overstated carbon emission reductions from voluntary redd+ projects in the brazilian amazon                                         | 10.1073/pnas.2004334117     | 2020 | Multiple         | Multiple | Forestry  | Avoided deforestation |  |
| 8  | West et al.                | Action needed to make carbon offsets from forest conservation work for climate change mitigation                                    | 10.1126/science.ade3535     | 2023 | Multiple         | Multiple | Forestry  | Avoided deforestation |  |
| 9  | Guizar-Coutiño et al. 2023 | A global evaluation of the effectiveness of voluntary REDD+ projects at reducing deforestation and degradation in the moist tropics | 10.1111/cobi.13970          | 2023 | Multiple         | Multiple | Forestry  | Avoided deforestation |  |
| 10 | Bomfim et al. 2023         | Forest Carbon Accounting (in Quality assessment of REDD+ carbon credit projects. Berkeley Carbon Trading Project)                   | NA                          | 2023 | Multiple         | Multiple | Forestry  | Avoided deforestation |  |
| 11 | Holm et al. 2023           | Durability (in Quality assessment of REDD+ carbon credit projects. Berkeley Carbon Trading Project)                                 | NA                          | 2023 | Multiple         | Multiple | Forestry  | Avoided deforestation |  |
| 12 | Coffield et al. 2022       | Using remote sensing to quantify the additional climate benefits of California forest carbon offset projects                        | 10.1111/gcb.16380           | 2022 | Northern America | USA      | Forestry  | IFM                   |  |
| 13 | Stapp et al. 2023          | Little evidence of                                                                                                                  | 10.1038/s43247-023-00984-2  | 2023 | Northern         | USA      | Forestry  | IFM                   |  |

|    |                     |                                                                         |                                                                                   |      |                  |     |          |     |
|----|---------------------|-------------------------------------------------------------------------|-----------------------------------------------------------------------------------|------|------------------|-----|----------|-----|
|    |                     | management change in California's forest offset program                 |                                                                                   |      | America          |     |          |     |
| 14 | Badgley et al. 2021 | Systematic over-crediting in California's forest carbon offsets program | <a href="https://doi.org/10.1111/gcb.15943">https://doi.org/10.1111/gcb.15943</a> | 2021 | Northern America | USA | Forestry | IFM |

**Supplementary Table 5: Studies evaluating field interventions**

| # | Authors                                                                                            | Title                                                                                                                               | DOI                             | Year | Region        | Country                  | Sector           | Project type |
|---|----------------------------------------------------------------------------------------------------|-------------------------------------------------------------------------------------------------------------------------------------|---------------------------------|------|---------------|--------------------------|------------------|--------------|
| 1 | Gillenwater et al                                                                                  | Additionality of wind energy investments in the U.S. voluntary green power market                                                   | 10.1016/j.renene.2013.10.003    | 2013 | North America | United States of America | Renewable Energy | Wind         |
| 2 | Ludwinski D., Moriarty K., Wydick B.                                                               | Environmental and health impacts from the introduction of improved wood stoves: evidence from a field experiment in Guatemala       | 10.1007/s10668-011-9282-z       | 2011 | Latin America | Guatemala                | Household        | Cookstoves   |
| 3 | Jeuland M.A., Pattanayak S.K., Samaddar S., Shah R., Vora M.                                       | Adoption and impacts of improved biomass cookstoves in rural Rajasthan                                                              | 10.1016/j.esd.2020.06.006       | 2020 | Asia          | India                    | Household        | Cookstoves   |
| 4 | Brooks N., Bhojvaid V., Jeuland M.A., Lewis J.J., Patange O., Pattanayak S.K.                      | How much do alternative cookstoves reduce biomass fuel use? Evidence from north India                                               | 10.1016/j.reseneeco.2015.12.001 | 2016 | Asia          | India                    | Household        | Cookstoves   |
| 5 | Adrianzen, A.                                                                                      | Improved cooking stoves and firewood consumption: quasi-experimental evidence from the northern Peruvian Andes                      | 10.1016/j.ecolecon.2013.02.010  | 2013 | Latin America | Peru                     | Household        | Cookstoves   |
| 6 | Mekonen, A., Beyene, A., Bluffstone, R., Gebreegziabher, Z., Martinsson, P., Toman, M., Vieder, F. | Do improved biomass cookstoves reduce fuelwood consumption and carbon emissions? Evidence from a field experiment in rural Ethiopia | 10.1016/j.ecolecon.2022.107467  | 2022 | Africa        | Ethiopia                 | Household        | Cookstoves   |
| 7 | Hanna R., Duflo E., Greenstone M.                                                                  | Up in smoke: the influence of household behavior on the long-run impact                                                             | 10.1257/pol.20140008            | 2016 | Asia          | India                    | Household        | Cookstoves   |



|    |                                                                              |                                                                                                                       |                                |      |               |         |           |                       |
|----|------------------------------------------------------------------------------|-----------------------------------------------------------------------------------------------------------------------|--------------------------------|------|---------------|---------|-----------|-----------------------|
|    |                                                                              | of improved cooking stoves                                                                                            |                                |      |               |         |           |                       |
| 8  | Beltramo T., Levine D.I.                                                     | The effect of solar ovens on fuel use, emissions and health: results from a randomised controlled trial               | 10.1080/19439342.2013.775175   | 2013 | Africa        | Senegal | Household | Cookstoves            |
| 9  | Bensch G., Peters J.                                                         | The intensive margin of technology adoption – Experimental evidence on improved cooking stoves in rural Senegal       | 10.1016/j.jhealeco.2015.03.006 | 2015 | Africa        | Senegal | Household | Cookstoves            |
| 10 | Bensch and Peters                                                            | Alleviating Deforestation Pressures? Impacts of Improved Stove Dissemination on Charcoal Consumption in Urban Senegal | 10.3368/le.89.4.676            | 2013 | Africa        | Senegal | Household | Cookstoves            |
| 11 | Berkouwer, S., Dean, J.                                                      | Credit and attention in the adoption of profitable energy efficient technologies in Kenya                             | 10.1257/aer.20210766           | 2022 | Africa        | Kenya   | Household | Cookstoves            |
| 12 | Carrilho C.D., Demarchi G., Duchelle A.E., Wunder S., Morsello C.            | Permanence of avoided deforestation in a transamazon redd+ project (par , brazil)                                     | 10.1016/j.ecolecon.2022.107568 | 2022 | Latin America | Brazil  | Forestry  | Avoided deforestation |
| 13 | Simonet G., Subervie J., Ezzine-De-Blas D., Cromberg M., Duchelle A.E.       | Effectiveness of a redd project in reducing deforestation in the brazilian amazon                                     | 10.1093/ajae/aay028            | 2018 | Latin America | Brazil  | Forestry  | Avoided deforestation |
| 14 | Von Thaden J., Manson R.H., Congalton R.G., Lopez-Barrera F., Salcone J.     | A regional evaluation of the effectiveness of mexico's payments for hydrological services                             | 10.1007/s10113-019-01518-3     | 2019 | Latin America | Mexico  | Forestry  | Avoided deforestation |
| 15 | Jayachandran S., De Laat J., Lambin E.F., Stanton C.Y., Audy R., Thomas N.E. | Cash for carbon: a randomized trial of payments for ecosystem services to reduce deforestation                        | 10.1126/science.aan0568        | 2017 | Africa        | Uganda  | Forestry  | Avoided deforestation |
| 16 | Montoya-Zumaeta J., Rojas E., Wunder S.                                      | Adding rewards to regulation: the impacts of watershed conservation on land cover and household                       | 10.1371/journal.pone.0225367   | 2019 | Latin America | Peru    | Forestry  | Avoided deforestation |

|    |                                                                                                |                                                                                                                                     |                                  |      |               |            |          |                       |
|----|------------------------------------------------------------------------------------------------|-------------------------------------------------------------------------------------------------------------------------------------|----------------------------------|------|---------------|------------|----------|-----------------------|
|    |                                                                                                | wellbeing in moyobamba, peru                                                                                                        |                                  |      |               |            |          |                       |
| 17 | Le Velly, G; Sauquet, A; Cortina-Villar, S                                                     | PES impact and leakages over several cohorts: the case of the psa-h in yucatan, mexico                                              | 10.3368/le.93.2.230              | 2017 | Latin America | Mexico     | Forestry | Avoided deforestation |
| 18 | Mohebalian P.M., Aguilar F.X.                                                                  | Design of tropical forest conservation contracts considering risk of deforestation                                                  | 10.1016/j.landusepol.2017.11.008 | 2018 | Latin America | Ecuador    | Forestry | Avoided deforestation |
| 19 | Jones K.W., Holland M.B., Naughton-Treves L., Morales M., Suarez L., Keenan K.                 | Forest conservation incentives and deforestation in the ecuadorian amazon                                                           | 10.1017/s0376892916000308        | 2017 | Latin America | Ecuador    | Forestry | Avoided deforestation |
| 20 | Costedoat S., Corbera E., Ezzine-de-Blas D., Honey-Rosés J., Baylis K., Castillo-Santiago M.A. | How effective are biodiversity Conservation payments in mexico?                                                                     | 10.1371/journal.pone.0119881     | 2015 | Latin America | Mexico     | Forestry | Avoided deforestation |
| 21 | Clements T., Milner-Gulland E.J.                                                               | Impact of payments for environmental services and protected areas on local livelihoods and forest conservation in northern cambodia | 10.1111/cobi.12423               | 2014 | Asia          | Cambodia   | Forestry | Avoided deforestation |
| 22 | Ramirez-Reyes C., Sims K.R.E., Potapov P., Radeloff V.C.                                       | Payments for ecosystem services in mexico reduce forest fragmentation                                                               | 10.1002/eap.1753                 | 2018 | Latin America | Mexico     | Forestry | Avoided deforestation |
| 23 | Honey-Roses J., Baylis K., Ramirez M.L.                                                        | A spatially explicit estimate of avoided forest loss                                                                                | 10.1111/j.1523-1739.2011.01729.x | 2018 | Latin America | Mexico     | Forestry | Avoided deforestation |
| 24 | Arriagada R.A., Ferraro P.J., Sills E.O., Pattanayak S.K., Cordero-Sancho S.                   | Do payments for environmental services affect forest cover? a farm-level evaluation from costa rica                                 | 10.3368/le.88.2.382              | 2012 | Latin America | Costa Rica | Forestry | Avoided deforestation |
| 25 | Ruggiero P.G.C., Metzger J.P., Reverberi Tambosi L., Nichols E.                                | Payment for ecosystem services programs in the brazilian atlantic forest: effective but not enough                                  | 10.1016/j.landusepol.2018.11.054 | 2019 | Latin America | Brazil     | Forestry | Avoided deforestation |
| 26 | Robalino, J; Pfaff, A; Sandoval,                                                               | Can we increase the impacts from payments                                                                                           | 10.1016/j.forpol.2021.10257      | 2021 | Latin America | Costa Rica | Forestry | Avoided deforestation |

|    |                                                                                                                                        |                                                                                                                                       |                                      |      |               |            |          |                       |
|----|----------------------------------------------------------------------------------------------------------------------------------------|---------------------------------------------------------------------------------------------------------------------------------------|--------------------------------------|------|---------------|------------|----------|-----------------------|
|    | C; Sanchez-Azofeifa, GA                                                                                                                | for ecosystem services? impact rose over time in costa rica, yet spatial variation indicates more potential                           |                                      |      |               |            |          |                       |
| 27 | Robalino et al                                                                                                                         | Evaluating Interactions of Forest Conservation Policies on Avoided Deforestation                                                      | doi.org/10.1371/journal.pone.0124910 | 2015 | Latin America | Costa Rica | Forestry | Avoided deforestation |
| 28 | Bos A.B., Duchelle A.E., Angelsen A., Avitabile V., De Sy V., Herold M., Joseph S., De Sassi C., Sills E.O., Sunderlin W.D., Wunder S. | Comparing methods for assessing the effectiveness of subnational redd+ initiatives                                                    | 10.1088/1748-9326/aa7032             | 2017 | Multiple      | Multiple   | Forestry | Avoided deforestation |
| 29 | Correa J., Cisneros E., Borchner J., Pfaff A., Costa M., Rajão R.                                                                      | Evaluating redd+ at subnational level: amazon fund impacts in alta floresta, brazil                                                   | 10.1016/j.forpol.2020.102178         | 2020 | Latin America | Brazil     | Forestry | Avoided deforestation |
| 30 | Ellis E.A., Sierra-Huelsz J.A., Ceballos G.C.O., Binnqvist C.L., Cerdón C.R.                                                           | Mixed effectiveness of redd+ subnational initiatives after 10 years of interventions on the yucatan peninsula, mexico                 | 10.3390/fl1091005                    | 2020 | Latin America | Mexico     | Forestry | Avoided deforestation |
| 31 | Roopsind A., Sohngen B., Brandt J.                                                                                                     | Evidence that a national redd program reduces tree cover loss and carbon emissions in a high forest cover, low deforestation country  | 10.1073/pnas.1904027116              | 2019 | Latin America | Guyana     | Forestry | Avoided deforestation |
| 32 | Sims K.R.E., Alix-Garcia J.M.                                                                                                          | Parks versus pes: evaluating direct and incentive-based land conservation in mexico                                                   | 10.1016/j.jjeem.2016.11.010          | 2016 | Latin America | Mexico     | Forestry | Avoided deforestation |
| 33 | Alix-Garcia J.M., Sims K.R.E., Yañez-Pagans P.                                                                                         | Only one tree from each seed? environmental effectiveness and poverty alleviation in mexico's payments for ecosystem services program | 10.1257/pol.20130139                 | 2015 | Latin America | Mexico     | Forestry | Avoided deforestation |

|    |                                                                                                           |                                                                                                                                            |                                |      |               |          |          |                       |
|----|-----------------------------------------------------------------------------------------------------------|--------------------------------------------------------------------------------------------------------------------------------------------|--------------------------------|------|---------------|----------|----------|-----------------------|
| 34 | Alix-Garcia J.M., Shapiro E.N., Sims K.R.E.                                                               | Forest conservation and slippage: evidence from mexico's national payments for ecosystem services program                                  | 10.3368/le.88.4.613            | 2012 | Latin America | Mexico   | Forestry | Avoided deforestation |
| 35 | Chervier C., Costedoat S.                                                                                 | Heterogeneous impact of a collective payment for environmental services scheme on reducing deforestation in cambodia                       | 10.1016/j.worlddev.2017.04.014 | 2017 | Asia          | Cambodia | Forestry | Avoided deforestation |
| 36 | Jones K.W., Mayer A., Von Thaden J., Berry Z.C., López-Ramírez S., Salcone J., Manson R.H., Asbjornsen H. | Measuring the net benefits of payments for hydrological services programs in mexico                                                        | 10.1016/j.ecolecon.2020.106666 | 2020 | Latin America | Mexico   | Forestry | Avoided deforestation |
| 37 | Giudice R., Börner J., Wunder S., Cisneros E.                                                             | Selection biases and spillovers from collective conservation incentives in the peruvian amazon                                             | 10.1088/1748-9326/aafc83       | 2019 | Latin America | Peru     | Forestry | Avoided deforestation |
| 38 | Jones K.W., Lewis D.J.                                                                                    | Estimating the counterfactual impact of conservation programs on land cover outcomes: the role of matching and panel regression techniques | 10.1371/journal.pone.0141380   | 2015 | Latin America | Ecuador  | Forestry | Avoided deforestation |
| 39 | Cisneros E., Börner J., Pagiola S., Wunder S.                                                             | Impacts of conservation incentives in protected areas: the case of bolsa floresta, brazil                                                  | 10.1016/j.jeem.2021.102572     | 2022 | Latin America | Brazil   | Forestry | Avoided deforestation |
| 40 | Etchart N., Freire J.L., Holland M.B., Jones K.W., Naughton-Treves L.                                     | What happens when the money runs out? forest outcomes and equity concerns following ecuador's suspension of conservation payments          | 10.1016/j.worlddev.2020.105124 | 2020 | Latin America | Brazil   | Forestry | Avoided deforestation |
| 41 | Pagiola S., Honey-Rosés J., Freire-González J.                                                            | Evaluation of the permanence of land use change induced by payments for environmental services in quindío, colombia                        | 10.1371/journal.pone.0147829   | 2016 | Latin America | Colombia | Forestry | Avoided deforestation |

|    |                                                                                |                                                                                                                                 |                                  |      |               |                |          |                             |
|----|--------------------------------------------------------------------------------|---------------------------------------------------------------------------------------------------------------------------------|----------------------------------|------|---------------|----------------|----------|-----------------------------|
| 42 | Fiorini A.C., Mullally C., Swisher M., Putz F.E.                               | Forest cover effects of payments for ecosystem services: evidence from an impact evaluation in brazil                           | 10.1016/j.ecolecon.2019.106522   | 2020 | Latin America | Brazil         | Forestry | Avoided deforestation       |
| 43 | Montoya-Zumaeta J.G., Wunder S., Rojas E., Duchelle A.E.                       | Does redd+ complement law enforcement? evaluating impacts of an incipient initiative in madre de dios, peru                     | 10.3389/ffgc.2022.870450         | 2022 | Latin America | Peru           | Forestry | Avoided deforestation       |
| 44 | Sharma B.P., Karky B.S., Nepal M., Pattanayak S.K., Sills E.O., Shyamsundar P. | Making incremental progress: impacts of a redd+ pilot initiative in nepal                                                       | 10.1088/1748-9326/aba924         | 2020 | Asia          | Nepal          | Forestry | Avoided deforestation       |
| 45 | Zhou T., Shen W., Qiu X., Chang H., Yang H., Yang W.                           | Impact evaluation of a payments for ecosystem services program on vegetation quantity and quality restoration in inner mongolia | 10.1016/j.jenvman.2021.114113    | 2022 | Asia          | Inner Mongolia | Forestry | Avoided deforestation       |
| 46 | España F., Arriagada R., Melo O., Foster W.                                    | Forest plantation subsidies: impact evaluation of the chilean case                                                              | 10.1016/j.forpol.2022.102696     | 2022 | Latin America | Chile          | Forestry | Afforestation/Reforestation |
| 47 | Fu G., Uchida E., Shah M., Deng X.                                             | Impact of the grain for green program on forest cover in china                                                                  | 10.1080/21606544.2018.1552626    | 2019 | Asia          | China          | Forestry | Avoided deforestation       |
| 48 | Hayes T., Murtinho F., Wolff H., López-Sandoval M.F., Salazar J.               | Effectiveness of payment for ecosystem services After loss and uncertainty of compensation                                      | 10.1038/s41893-021-00804-5       | 2022 | Latin America | Ecuador        | Forestry | Avoided deforestation       |
| 49 | Linkie M., Smith, R., Zhu Y., Martyr, D., et al                                | Evaluating Biodiversity Conservation around a Large Sumatran Protected Area                                                     | 10.1111/j.1523-1739.2008.00906.x | 2007 | Asia          | Indonesia      | Forestry | Avoided deforestation       |
| 50 | Erbaugh J.T.                                                                   | Impermanence and failure: the legacy of conservation-based payments in sumatra, indonesia                                       | 10.1088/1748-9326/ac6437         | 2022 | Asia          | Indonesia      | Forestry | Avoided deforestation       |
| 51 | Cuenca P., Robalino J., Arriagada R., Echeverría C.                            | Are government incentives effective for avoided deforestation in                                                                | 10.1371/journal.pone.0203545     | 2018 | Latin America | Ecuador        | Forestry | Avoided deforestation       |

|  |  |                             |  |  |  |  |  |
|--|--|-----------------------------|--|--|--|--|--|
|  |  | the tropical andean forest? |  |  |  |  |  |
|--|--|-----------------------------|--|--|--|--|--|

For IFM and wind power, we do not find statistically significant results. Yet, these projects could still lead to emissions reductions but may be statistically underpowered. We, therefore, inspect the point estimates of these studies and find that for two of them, the point estimates are either inconclusive or indicate an emissions increase (rather than a reduction). For these projects, we therefore assume an OAR of 0.

**Supplementary Table 6: OAR detailed approach for calculations**

| <b>Study</b>                                       | <b>Sector, project type</b>     | <b>Transformation approach</b>                                                                                                                                                                                                                                                                                                                                                                                                                                                                                                                                                                                                                                                                                                                                                                                                                                                                                                                                                                                                                                                                                                                                                                                                                                                                                                                                                                                                                                              |
|----------------------------------------------------|---------------------------------|-----------------------------------------------------------------------------------------------------------------------------------------------------------------------------------------------------------------------------------------------------------------------------------------------------------------------------------------------------------------------------------------------------------------------------------------------------------------------------------------------------------------------------------------------------------------------------------------------------------------------------------------------------------------------------------------------------------------------------------------------------------------------------------------------------------------------------------------------------------------------------------------------------------------------------------------------------------------------------------------------------------------------------------------------------------------------------------------------------------------------------------------------------------------------------------------------------------------------------------------------------------------------------------------------------------------------------------------------------------------------------------------------------------------------------------------------------------------------------|
| West et al (2020, 2023),<br>Guizar-Coutinho (2023) | Forestry, Avoided deforestation | <p>All studies report changes in deforestation (and, for Guizar-Coutiño degradation) rates between projects sites and those not covered. See equation (3) in main manuscript for approach to convert numbers.</p> <p>West et al. analyse 36 projects, whereas Guizar-Coutinho et al. analyses 40 projects. To compute the OAR, we needed to post-process the existing study results. Estimates of the likely actual emission reductions were based on the average carbon stock per hectare of the most representative forest stratum and post-deforestation land-use class in the project area, obtained from the official project descriptions, multiplied by the estimated forest area prevented from deforestation (ha). The estimates of the area prevented from deforestation by Guizar-Coutiño et al. are based on the difference between control and project deforestation (%) multiplied by the project area (ha). Our estimate of the likely actual emission reductions were then compared to the volumes of credits issued to the projects. To make the estimates of the studies comparable, we consider the same time periods. As Guizar-Coutiño et al.<sup>1</sup> use shorter timeframes (5 years) than the West et al.<sup>2,3</sup> studies, we use the time periods covered in Guizar-Coutiño and re-calculate the original estimates from the West studies for the same time frames. To calculate the issued credits during the covered time frame, we</p> |

|                               |                                      |                                                                                                                                                                                                                                                                                                                                                                                                                                                                                                                                                                                                                                                                                               |
|-------------------------------|--------------------------------------|-----------------------------------------------------------------------------------------------------------------------------------------------------------------------------------------------------------------------------------------------------------------------------------------------------------------------------------------------------------------------------------------------------------------------------------------------------------------------------------------------------------------------------------------------------------------------------------------------------------------------------------------------------------------------------------------------|
|                               |                                      | <p>proceed in two steps. First, we compile a list with the total volume of credits issued for each VCS project covered in the studies. Second, we compute the average yearly issued credit volume and calculate the total average 5-year issuance for each project.</p>                                                                                                                                                                                                                                                                                                                                                                                                                       |
| Stapp et al., Coffield et al. | Forestry, Improved Forest Management | <p>Both studies assess the changes in disturbance/harvesting rates on project and non-project areas. As both studies find no statistically significant change to harvesting rates, we assume an OAR of 0.</p>                                                                                                                                                                                                                                                                                                                                                                                                                                                                                 |
| Aung et al.                   | Household, Cookstoves                | <p>Aung finds no statistically significant change in biomass consumption in treated and non-treated households. While Aung only covers one factor of over/under-crediting (in contrast to Gill-Wiehl, which covers all relevant factors), we assume an OAR of 0, because if there are no changes to biomass consumption, the study results would not change, even if the study considered other over/under-crediting factors.</p>                                                                                                                                                                                                                                                             |
| Gill-Wiehl et al.             | Household, Cookstoves                | <p>The study directly estimates the OAR, which is the inverse of the over-crediting factor provided in the study (1/over-crediting). Please note that to determine the total volume of issued credits from the projects in Figure 5, we update the information from the manuscript by using the Berkeley Voluntary Registry Offsets database v9 version, which covers credits up to Nov 2023<sup>4</sup>.</p>                                                                                                                                                                                                                                                                                 |
| Schneider 2011                | Chemicals, HFC-23                    | <p>For two HFC-23 CDM plants it was observed that they generated less waste gas during periods in which they could not issue carbon credits (Schneider 2011). For these two plants we determine the offset achievement ratio for two different scenarios: (1) assuming that the plants would have operated at the waste generation rate observed in the period where they were not eligible for crediting and (2) assuming that the plants would have operated at historical waste generation rates observed prior to crediting. The average value resulting from these scenarios is used as the central estimate for the OAR. The analysis is based on data used in the underlying paper</p> |

|                                  |                        |                                                                                                                                                                                                                                                                                                                                                   |
|----------------------------------|------------------------|---------------------------------------------------------------------------------------------------------------------------------------------------------------------------------------------------------------------------------------------------------------------------------------------------------------------------------------------------|
|                                  |                        | and does not include data on monitoring reports that were published later on. The total number of credits issued to the plants is drawn from the UNFCCC CDM database.                                                                                                                                                                             |
| Schneider and Kollmuss 2015      | Chemicals, HFC-23/SF6  | For the three projects abating HFC-23 and/or SF6 waste gas in Russia we determine the offset achievement ratio based on the three scenarios provided in the supplementary information of the underlying paper. The total issuance of 54 million emission reduction units (ERUs) is also taken from the paper.                                     |
| Chan and Huenteler; Calel et al. | Renewable Energy, Wind | Chan and Huenteler do not find statistically significant differences in the viability between projects that sold credits under the CDM and those that did not. We, therefore, assume an OAR of 0. Calel et al. could not be integrated into our quantitative framework as they only provide upper bound estimates (see discussion in manuscript). |

**Supplementary Table 7: Studies that could not be integrated into quantitative framework**

| <b>Study</b>        | <b>Reason for non-integration</b>                                                                                                                                                                                                                              |
|---------------------|----------------------------------------------------------------------------------------------------------------------------------------------------------------------------------------------------------------------------------------------------------------|
| Calel et al.        | Study only identifies the most obvious cases of non-additionality, but the authors do not provide a central estimate.                                                                                                                                          |
| Bomfim et al. 2023  | Study assesses problems relating to carbon accounting. We felt that that it would be inadequate to use the findings from the 12 sample projects and apply it to all covered projects in the review.                                                            |
| Holm et al. 2023    | Study assesses the durability of issued carbon credits, identifying that reversal risks are likely underestimated. Yet, as our review focuses on ex-post studies, we were unable to integrate the forward-looking methodology into our quantitative framework. |
| Badgley et al. 2021 | Study assesses over-crediting from IFM projects in California. Yet, the study does not directly analyze counterfactual project areas, and thus, cannot be integrated in our framework.                                                                         |



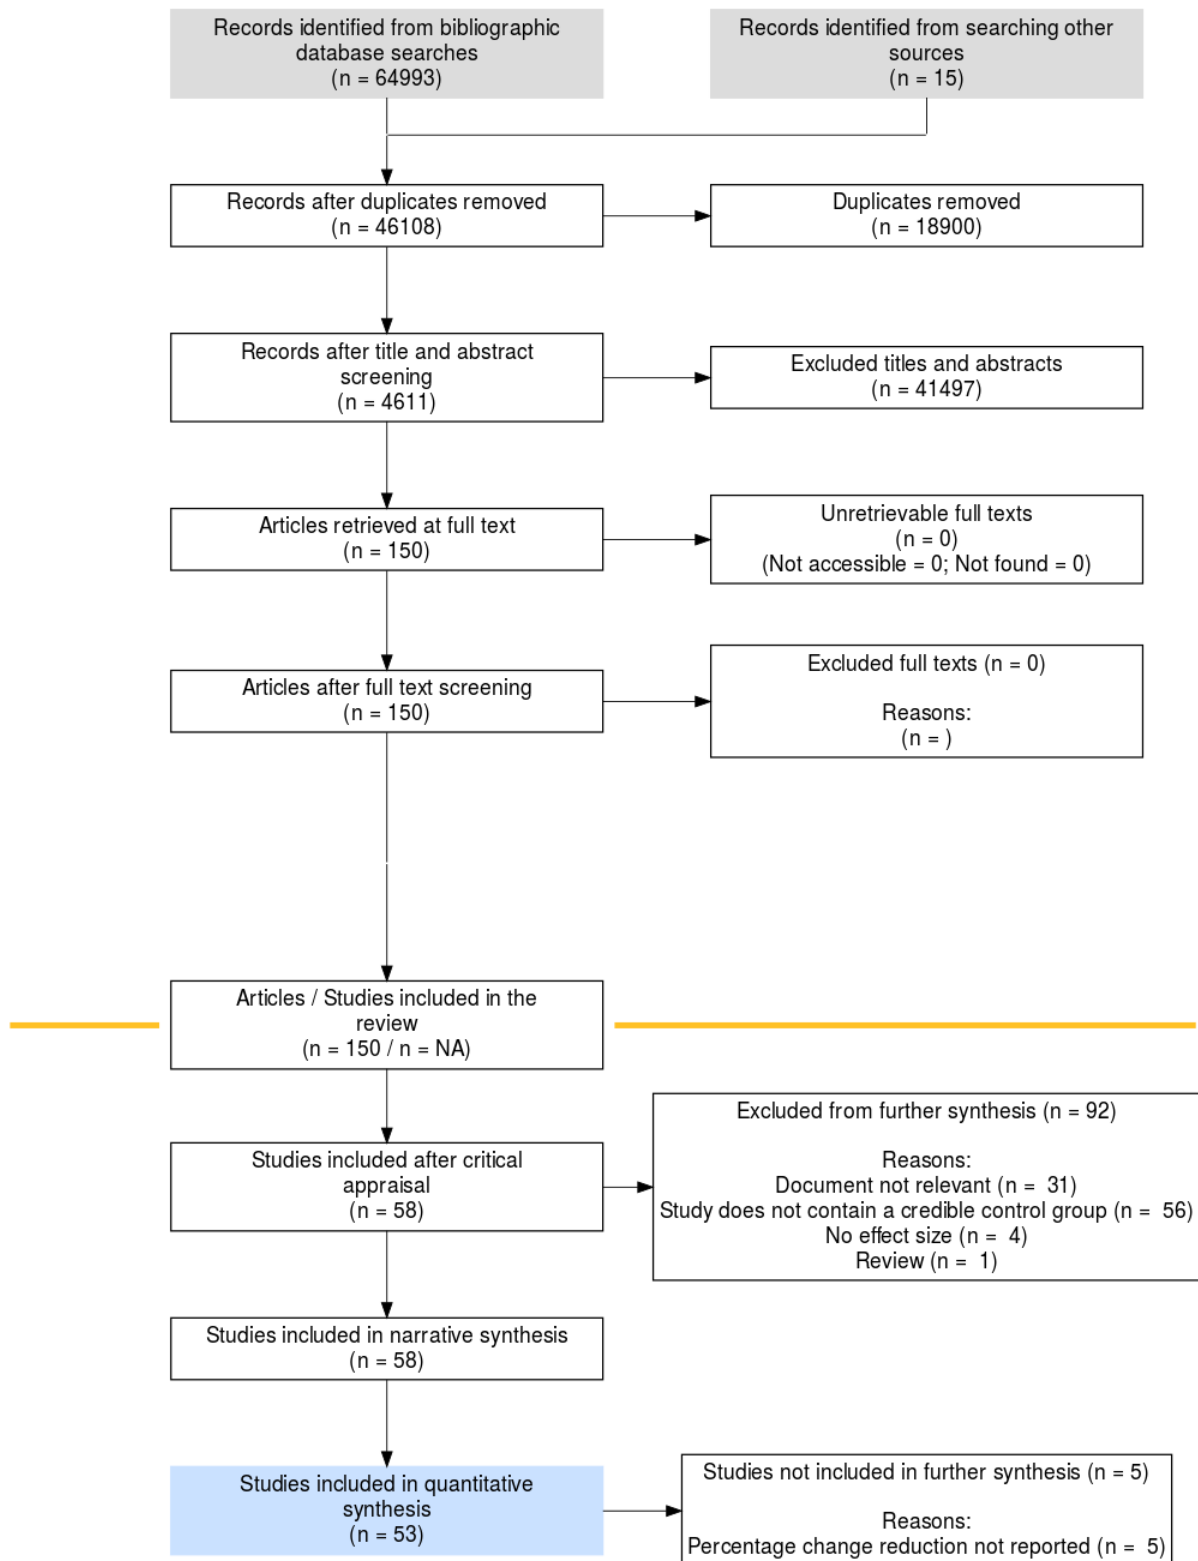

**Supplementary Figure 1: ROSES flow diagram for systematic reviews.**

The figure shows the screening process used in the systematic assessment, starting from a full set of potentially relevant studies (64,993) to the final set of studies that were included in the quantitative synthesis. Please note that 12 additional studies were included due to manual search not shown in figure.
